# Supplementary material for: Genotypic Differences in Morphological, Physiological and Agronomic Traits in Wheat (Triticum aestivum L.) in Response to Drought
Source: MDPI journal article supplement (doi:10.3390/plants13020307), 2024-01-20
Supplement: s1 [file s1]

### Drought-sensitive genotypes

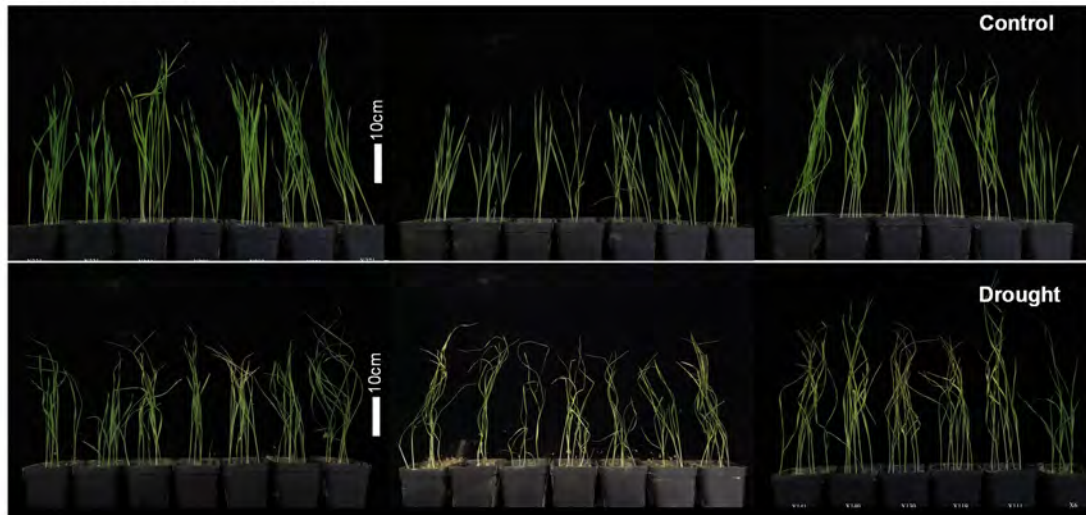

### Drought-tolerant genotypes

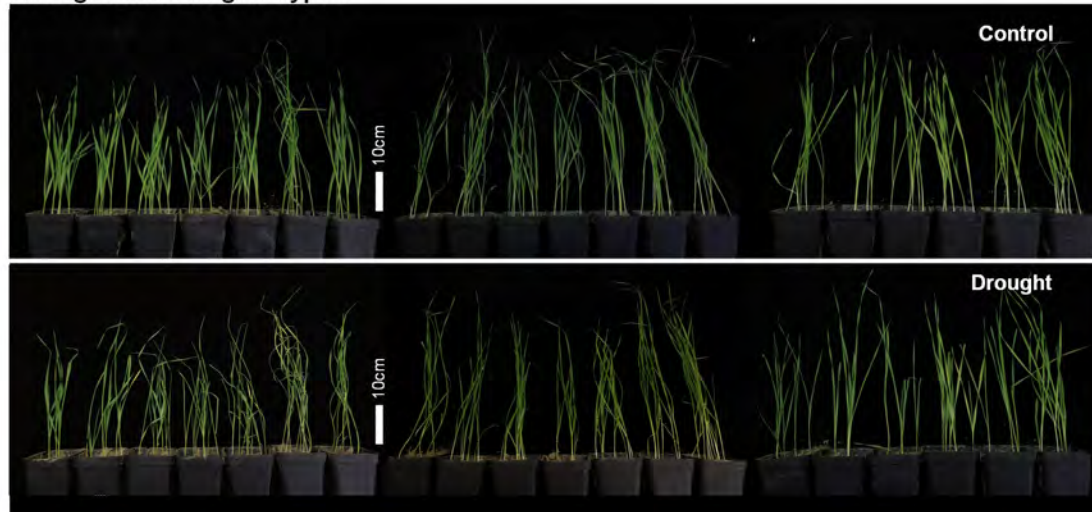

Figure S1. Seedling phenotypes of drought tolerant and sensitive wheat genotypes in the pot experiment one under drought treatment at SMC 4%.

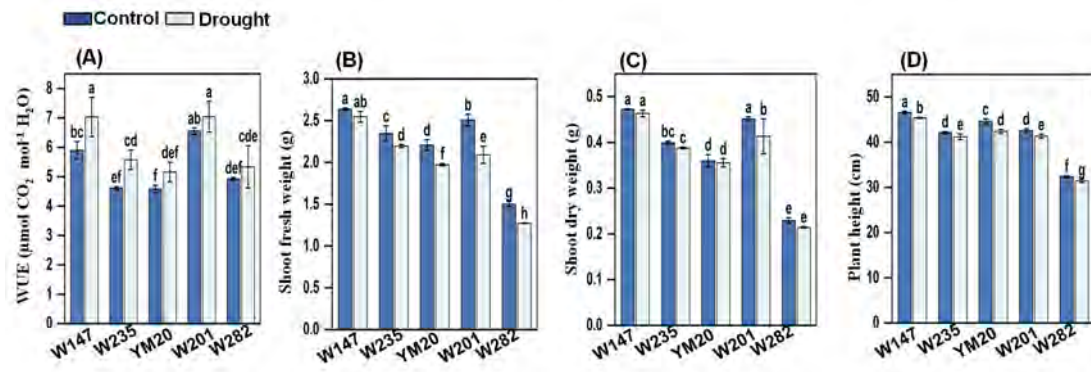

Figure S2. Effects of drought stress on agronomic traits and water metabolism of different wheat genotypes. (A) water use efficiencies (WUE), (B) shoot fresh weights, (C) shoot dry weight, (D) plant height. Data are means  $\pm$  SEs (n = 3), different letters indicate significant differences at P < 0.05 according to Tukey's test.

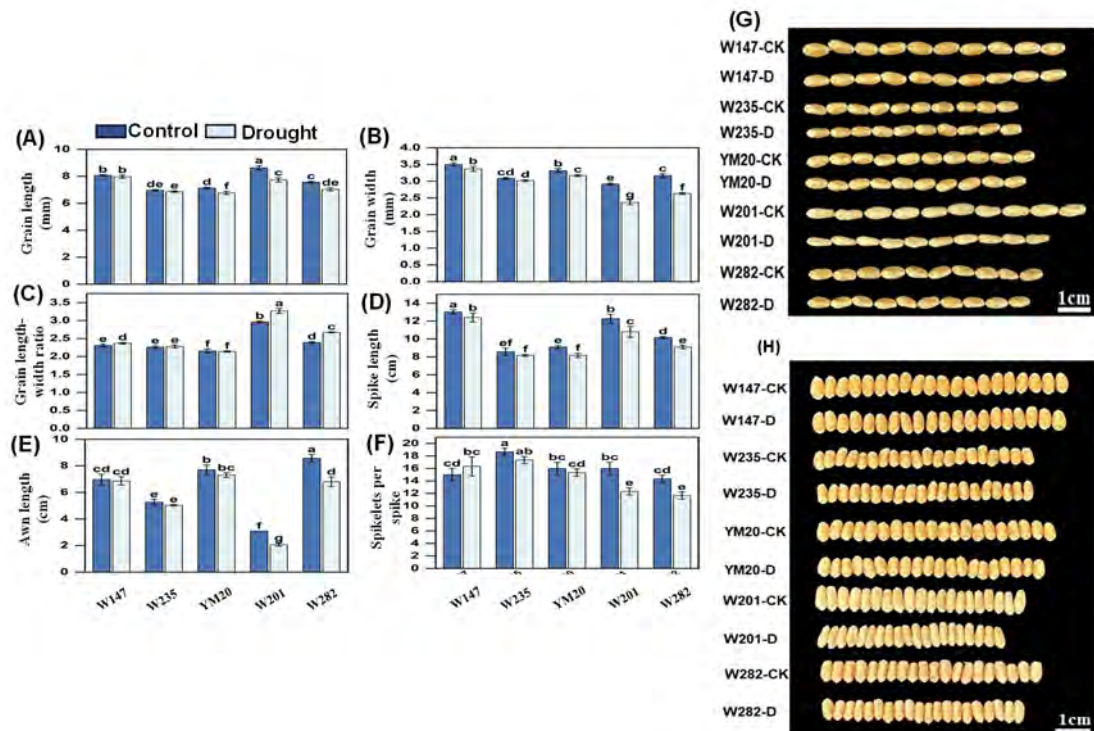

Figure S3. Effects of drought stress on yield parameters of different wheat genotypes. (A, G) Grain length; (B, H) Grain width; (C) Grain length-width ratio; (D) Spike length; (E) Awn length; (F) Spikelets per spike; Data are means  $\pm$  SE (n=5), different letters indicate significant difference ( $p < 0.05$ ).

**Table S1 The detail information of 334 wheat core germplasms**

| Number | Name               | Origin    | Number | Name  | Origin |
|--------|--------------------|-----------|--------|-------|--------|
| W1     | 073/44             | Australia | W168   | H-142 | China  |
| W2     | 92FS-16            | Australia | W169   | H-143 | China  |
| W3     | AEGYLOPS 14257     | Australia | W170   | H-144 | China  |
| W4     | AFGHANISTAN 7      | Australia | W171   | H-145 | China  |
| W5     | AHGAF              | Australia | W172   | H-146 | China  |
| W6     | ALBIDUM 24         | Australia | W173   | H-147 | China  |
| W7     | Al-wheat           | Australia | W174   | H-148 | China  |
| W8     | ARTEMOVKA          | Australia | W175   | H-149 | China  |
| W9     | AUS 19392          | Australia | W176   | H-150 | China  |
| W10    | AUS 19393          | Australia | W177   | H-151 | China  |
| W11    | AUS 19394          | Australia | W178   | H-152 | China  |
| W12    | AUS 19395          | Australia | W179   | H-153 | China  |
| W13    | AUS 19396          | Australia | W180   | H-154 | China  |
| W14    | AUS 19397          | Australia | W181   | H-155 | China  |
| W15    | AUS 19398          | Australia | W182   | H-157 | China  |
| W16    | AUS 19399          | Australia | W183   | H-159 | China  |
| W17    | AUS 19400          | Australia | W184   | H-160 | China  |
| W18    | AUS 19401          | Australia | W185   | H-161 | China  |
| W19    | AUS 19402          | Australia | W186   | H-162 | China  |
| W20    | AUS 19403          | Australia | W187   | H-163 | China  |
| W21    | AUS 19719          | Australia | W188   | H-164 | China  |
| W22    | AUS 19720          | Australia | W189   | H-165 | China  |
| W23    | B-T-17             | Australia | W190   | H-167 | China  |
| W24    | B-T-35             | Australia | W191   | H-168 | China  |
| W25    | B-T-38             | Australia | W192   | H-169 | China  |
| W26    | B-T-51             | Australia | W193   | H-170 | China  |
| W27    | BUKOVINKA          | Australia | W194   | H-171 | China  |
| W28    | CAZ5 3             | Australia | W195   | H-172 | China  |
| W29    | E.M.S. SUMMIT 70-8 | Australia | W196   | H-174 | China  |
| W30    | EXITO B            | Australia | W197   | H-175 | China  |
| W31    | FERRUGINEUM        | Australia | W198   | H-176 | China  |
| W32    | FRETES             | Australia | W199   | H-177 | China  |
| W33    | FRETES             | Australia | W200   | H-178 | China  |
| W34    | FRETES             | Australia | W201   | H-179 | China  |
| W35    | Glover             | Australia | W202   | H-180 | China  |
| W36    | H-001              | China     | W203   | H-181 | China  |
| W37    | H-002              | China     | W204   | H-183 | China  |
| W38    | H-003              | China     | W205   | H-184 | China  |
| W39    | H-004              | China     | W206   | H-185 | China  |
| W40    | H-005              | China     | W207   | H-186 | China  |
| W41    | H-006              | China     | W208   | H-187 | China  |
| W42    | H-007              | China     | W209   | H-189 | China  |
| W43    | H-008              | China     | W210   | H-190 | China  |
| W44    | H-009              | China     | W211   | H-191 | China  |
| W45    | H-010              | China     | W212   | H-192 | China  |
| W46    | H-011              | China     | W213   | H-193 | China  |
| W47    | H-012              | China     | W214   | H-194 | China  |
| W48    | H-013              | China     | W215   | H-195 | China  |
| W49    | H-014              | China     | W216   | H-196 | China  |
| W50    | H-015              | China     | W217   | H-197 | China  |
| W51    | H-016              | China     | W218   | H-198 | China  |
| W52    | H-016              | China     | W219   | H-199 | China  |
| W53    | H-017              | China     | W220   | H-200 | China  |
| W54    | H-019              | China     | W221   | H-201 | China  |
| W55    | H-020              | China     | W222   | H-202 | China  |
| W56    | H-021              | China     | W223   | H-203 | China  |
| W57    | H-022              | China     | W224   | H-204 | China  |
| W58    | H-023              | China     | W225   | H-205 | China  |
| W59    | H-024              | China     | W226   | H-206 | China  |

| Number | Name  | Origin | Number | Name                | Origin    |
|--------|-------|--------|--------|---------------------|-----------|
| W60    | H-025 | China  | W227   | H-207               | China     |
| W61    | H-026 | China  | W228   | H-208               | China     |
| W62    | H-027 | China  | W229   | H-209               | China     |
| W63    | H-028 | China  | W230   | H-210               | China     |
| W64    | H-030 | China  | W231   | H-211               | China     |
| W65    | H-031 | China  | W232   | H-212               | China     |
| W66    | H-032 | China  | W233   | H-213               | China     |
| W67    | H-033 | China  | W234   | H-214               | China     |
| W68    | H-034 | China  | W235   | H-215               | China     |
| W69    | H-035 | China  | W236   | H-216               | China     |
| W70    | H-037 | China  | W237   | H-217               | China     |
| W71    | H-038 | China  | W238   | H-218               | China     |
| W72    | H-039 | China  | W239   | H-219               | China     |
| W73    | H-040 | China  | W240   | H-220               | China     |
| W74    | H-041 | China  | W241   | H-221               | China     |
| W75    | H-042 | China  | W242   | H-222               | China     |
| W76    | H-043 | China  | W243   | H-223               | China     |
| W77    | H-044 | China  | W244   | H-224               | China     |
| W78    | H-045 | China  | W245   | H-225               | China     |
| W79    | H-046 | China  | W246   | H-226               | China     |
| W80    | H-047 | China  | W247   | H-227               | China     |
| W81    | H-048 | China  | W248   | H-228               | China     |
| W82    | H-049 | China  | W249   | H-229               | China     |
| W83    | H-050 | China  | W250   | H-230               | China     |
| W84    | H-051 | China  | W251   | H-231               | China     |
| W85    | H-052 | China  | W252   | H-232               | China     |
| W86    | H-053 | China  | W253   | H-233               | China     |
| W87    | H-054 | China  | W254   | H-234               | China     |
| W88    | H-055 | China  | W255   | H-235               | China     |
| W89    | H-056 | China  | W256   | H-236               | China     |
| W90    | H-057 | China  | W257   | H-237               | China     |
| W91    | H-058 | China  | W258   | H-238               | China     |
| W92    | H-059 | China  | W259   | H-239               | China     |
| W93    | H-060 | China  | W260   | H-240               | China     |
| W94    | H-061 | China  | W261   | H-241               | China     |
| W95    | H-062 | China  | W262   | H-242               | China     |
| W96    | H-063 | China  | W263   | H-243               | China     |
| W97    | H-064 | China  | W264   | H-244               | China     |
| W98    | H-065 | China  | W265   | H-245               | China     |
| W99    | H-066 | China  | W266   | H-246               | China     |
| W100   | H-067 | China  | W267   | H-247               | China     |
| W101   | H-068 | China  | W268   | H-249               | China     |
| W102   | H-069 | China  | W269   | H-250               | China     |
| W103   | H-070 | China  | W270   | H-251               | China     |
| W104   | H-071 | China  | W271   | H-252               | China     |
| W105   | H-073 | China  | W272   | H-253               | China     |
| W106   | H-074 | China  | W273   | Hartog              | Australia |
| W107   | H-075 | China  | W274   | HB 88 I - 172       | Australia |
| W108   | H-076 | China  | W275   | IG 43428            | Australia |
| W109   | H-077 | China  | W276   | JAKUTIANKA 224      | Australia |
| W110   | H-078 | China  | W277   | KARAGAN             | Australia |
| W111   | H-079 | China  | W278   | KAZAKHSTANSKAJA 126 | Australia |
| W112   | H-080 | China  | W279   | KHARCHIA 65         | Australia |
| W113   | H-081 | China  | W280   | KOPARA 73           | Australia |
| W114   | H-082 | China  | W281   | KORD CL PLUS        | Australia |
| W115   | H-083 | China  | W282   | KZYL-SARK           | Australia |
| W116   | H-084 | China  | W283   | LU 26S              | Australia |
| W117   | H-085 | China  | W284   | MAHON DEMIAS        | Australia |
| W118   | H-086 | China  | W285   | NAJAH               | Australia |
| W119   | H-087 | China  | W286   | NAPOSTA             | Australia |
| W120   | H-088 | China  | W287   | ONOHOISKAJA 4       | Australia |

| Number | Name  | Origin | Number | Name                 | Origin    |
|--------|-------|--------|--------|----------------------|-----------|
| W121   | H-089 | China  | W288   | PALESTINE 8          | Australia |
| W122   | H-090 | China  | W289   | PI 177971            | Australia |
| W123   | H-091 | China  | W290   | PI 178012            | Australia |
| W124   | H-092 | China  | W291   | PI 178704            | Australia |
| W125   | H-093 | China  | W292   | PI 180988            | Australia |
| W126   | H-094 | China  | W293   | PI 264952            | Australia |
| W127   | H-095 | China  | W294   | PI 94365             | Australia |
| W128   | H-096 | China  | W295   | POBEDA               | Australia |
| W129   | H-097 | China  | W296   | Preto Amarelo        | Australia |
| W130   | H-098 | China  | W297   | Revenue              | Australia |
| W131   | H-099 | China  | W298   | SEAGULL              | Australia |
| W132   | H-100 | China  | W299   | SEL OF HOURANI 27    | Australia |
| W133   | H-101 | China  | W300   | SEL OF HOURANI 27    | Australia |
| W134   | H-102 | China  | W301   | SKALA                | Australia |
| W135   | H-103 | China  | W302   | SOCIEDAD NACIONAL DE | Australia |
| W136   | H-104 | China  | W303   | SONNENWEIZEN         | Australia |
| W137   | H-105 | China  | W304   | SURHAK 5688          | Australia |
| W138   | H-106 | China  | W305   | SURHAK MESTNYJ       | Australia |
| W139   | H-107 | China  | W306   | SW95 50101           | Australia |
| W140   | H-108 | China  | W307   | SW95 50192           | Australia |
| W141   | H-109 | China  | W308   | SW95 50213           | Australia |
| W142   | H-110 | China  | W309   | SW95 50292           | Australia |
| W143   | H-111 | China  | W310   | TURCICUM 1           | Australia |
| W144   | H-112 | China  | W311   | VYSOKELITOVSKAYA     | Australia |
| W145   | H-113 | China  | W312   | W 5013 EY-11-1       | Australia |
| W146   | H-114 | China  | W313   | W 5228 HZ-1          | Australia |
| W147   | H-115 | China  | W314   | W 5924 DT-34         | Australia |
| W148   | H-116 | China  | W315   | wheat-2HBYDV         | China     |
| W149   | H-117 | China  | W316   | WL-wheat             | China     |
| W150   | H-118 | China  | W317   | Yang17               | China     |
| W151   | H-119 | China  | W318   | Yannong 15           | China     |
| W152   | H-120 | China  | W319   | Yannong 19           | China     |
| W153   | H-121 | China  | W320   | YRODY 1006           | Australia |
| W154   | H-122 | China  | W321   | YU-01                | China     |
| W155   | H-125 | China  | W322   | YU-02                | China     |
| W156   | H-126 | China  | W323   | YU-03                | China     |
| W157   | H-127 | China  | W324   | YU-04                | China     |
| W158   | H-129 | China  | W325   | YU-05                | China     |
| W159   | H-130 | China  | W326   | YU-06                | China     |
| W160   | H-131 | China  | W327   | YU-07                | China     |
| W161   | H-132 | China  | W328   | YU-08                | China     |
| W162   | H-133 | China  | W329   | YU-09                | China     |
| W163   | H-135 | China  | W330   | YU-10                | China     |
| W164   | H-136 | China  | W331   | YU-11                | China     |
| W165   | H-137 | China  | W332   | YU-12                | China     |
| W166   | H-138 | China  | W333   | YU-13                | China     |
| W167   | H-141 | China  | W334   | ZHONG 4              | China     |

**Table S2 The twenty most drought-sensitive genotypes (ranked from most to least sensitive) and the twenty most tolerant genotypes (ranked from most to least tolerant) selected from the hydroponic-air drought simulation.**

| Drought-sensitive genotypes                                                                                   | Drought-tolerance genotypes                                                                                     |
|---------------------------------------------------------------------------------------------------------------|-----------------------------------------------------------------------------------------------------------------|
| W201、W282、W130、W140、W271、<br>W288、W272、W321、W119、W311、<br>W111、W6、W331、W182、W172、W202、<br>W141、W179、W261、W211 | W147、W235、W267、W248、W328、<br>W154、W315、W164、W239、W316、<br>W126、W324、W236、W244、W223、<br>W106、W287、W144、W313、W216 |

**Table S3. Experiment Two. Effect of drought stress on growth and physiological traits of wheat plants in the pot experiment expressed as reduced (-)/increased (+) percentages of the well-watered controls.**

| Drought tolerance index    | W147   | W235   | W201   | W282   | YM20   | LSD <sub>0.05</sub> |
|----------------------------|--------|--------|--------|--------|--------|---------------------|
| Thousand-kernel weight (g) | -5.41  | -5.12  | -15.33 | -15.98 | -8.42  | 3.90                |
| Grains per spike           | 6.38   | 4.67   | -11.71 | 0.53   | -8.97  | 3.96                |
| Spikes/plant               | -27.14 | -25.00 | -33.33 | -44.29 | -50.00 | 1.00                |
| Grain yield per plant (g)  | -26.68 | -26.58 | -50.16 | -52.94 | -58.32 | 9.47                |
| Tr                         | -27.31 | -30.83 | -37.32 | -41.63 | -35.94 | 7.28                |
| Pn                         | -12.87 | -18.73 | -32.53 | -36.75 | -28.03 | 7.83                |
| Ci                         | -2.04  | -0.91  | -3.93  | -2.21  | -2.67  | 1.58                |
| Gs                         | -21.24 | -26.81 | -42.76 | -29.52 | -30.35 | 3.84                |
| SPAD value                 | -5.47  | -2.35  | -16.43 | -8.87  | -10.26 | 1.66                |
| Fv/Fm                      | -3.20  | -1.03  | -4.30  | -1.39  | -1.34  | 8.00                |
| ΦPSII                      | -19.40 | -10.00 | -19.79 | -25.63 | -27.22 | 5.01                |
| WSD                        | 7.33   | 8.54   | 49.55  | 44.04  | 22.28  | 13.27               |
| Free water                 | -1.40  | -1.33  | -2.82  | -1.40  | -2.32  | 0.96                |
| Bound water                | 51.96  | 55.02  | 14.58  | 16.10  | 27.73  | 10.96               |
| WUE                        | 18.74  | 20.68  | 7.11   | 7.29   | 12.20  | 1.36                |
| Plant height (cm)          | -2.65  | -2.14  | -2.98  | -2.98  | -5.07  | 2.34                |
| Shoot FW (g)               | -3.45  | -6.39  | -16.59 | -15.23 | -10.64 | 3.43                |
| Shoot DW(g)                | -1.95  | -2.87  | -8.42  | -6.47  | -1.13  | 1.80                |
| RWC (%)                    | -0.34  | -0.76  | -2.12  | -1.86  | -2.07  | 1.08                |
| Integrated Score           | -4.03  | -3.81  | -12.15 | -11.62 | -11.68 |                     |
